# Supplementary material for: “Multiple-Choice Items should be sequenced in order of difficulty with the easiest ones placed first”. Does it really affect performance?
Source: Research Square preprint supplement (doi:10.21203/rs.3.rs-2882983/v1), 2023-05-05
Supplement: Supplementary file 1 [file a29c2602c54e381edaa0485d.docx]

| **Tests of Between-Subjects Effects** | | | | | |
| --- | --- | --- | --- | --- | --- |
| Dependent Variable: fillin | | | | | |
| Source | Type III Sum of Squares | df | Mean Square | F | Sig. |
| Corrected Model | 1276.281a | 19 | 67.173 | 1.619 | .057 |
| Intercept | 10383.549 | 1 | 10383.549 | 250.245 | .000 |
| centre | 140.295 | 2 | 70.147 | 1.691 | .188 |
| gender | 5.697 | 1 | 5.697 | .137 | .711 |
| form | 374.897 | 4 | 93.724 | 2.259 | .065 |
| centre * gender | 18.815 | 2 | 9.407 | .227 | .797 |
| centre * form | 506.511 | 5 | 101.302 | 2.441 | .036 |
| gender * form | 57.920 | 4 | 14.480 | .349 | .844 |
| centre * gender * form | 1.888 | 1 | 1.888 | .046 | .831 |
| Error | 6763.457 | 163 | 41.494 |  |  |
| Total | 85007.000 | 183 |  |  |  |
| Corrected Total | 8039.738 | 182 |  |  |  |
| a. R Squared = .159 (Adjusted R Squared = .061) | | | | | |

S
